# Supplementary material for: A novel candidate species of Anaplasma that infects avian erythrocytes
Source: Springer Nature journal article supplement (doi:10.1186/s13071-018-3089-9), 2018-09-24
Supplement: 13071_2018_3089_MOESM2_ESM.pdf [file 13071_2018_3089_MOESM2_ESM.pdf]

**Additional file 2: Table S1.** GenBank accession codes for the sequences analyzed.

| <b>Species</b>                                      | <b>16S rRNA</b> | <b>groEL</b>    |
|-----------------------------------------------------|-----------------|-----------------|
| <i>Aegyptianella pullorum</i>                       | AY125087        | AY150648        |
| <i>Anaplasma bovis</i>                              | KY425420        | KY425421        |
| <i>Anaplasma capra</i>                              | KM206273        | KM206275        |
| <i>Anaplasma centrale</i>                           | CP001759        | CP001759        |
| <i>Anaplasma marginale</i>                          | CP006846        | CP006846        |
| <i>Anaplasma odocoilei</i>                          | JX876644        | JX876642        |
| <i>Anaplasma ovis</i>                               | AF414870        | AF441131        |
| <i>Anaplasma phagocytophilum</i>                    | CP015376        | CP015376        |
| <i>Anaplasma platys</i>                             | AY077619        | AY077621        |
| " <i>Candidatus Anaplasma boleense</i> "            | KX987334        | KX987391        |
| " <i>Candidatus Anaplasma camelii</i> "             | KF843823        | KJ814955        |
| " <i>Candidatus Anaplasma sphenisci</i> "           | MG748724        | MG748859        |
| " <i>Candidatus Cryptoplasma californiense</i> "    | KP276585        | KP276600        |
| <i>Ehrlichia canis</i>                              | NC_007354       | NC_007354       |
| <i>Ehrlichia chaffeensis</i>                        | NZ_CP007476     | NZ_CP007476     |
| <i>Ehrlichia ewingii</i>                            | U96436          | AF195273        |
| <i>Ehrlichia mineirensis</i>                        | JX629805        | JX629806        |
| <i>Ehrlichia muris</i>                              | NC_023063       | NC_023063       |
| <i>Ehrlichia occidentalis</i> *                     | not available   | KY425507        |
| <i>Ehrlichia ovina</i> *                            | AF318946        | not available   |
| <i>Ehrlichia ruminantium</i>                        | NC_005295.2     | NC_005295.2     |
| " <i>Candidatus Ehrlichia khabarensis</i> "         | KR063138        | KR063139        |
| " <i>Candidatus Ehrlichia occidentalis</i> "        | not available   | KY425507        |
| " <i>Candidatus Ehrlichia ornithorhynchi</i> "      | MF069159        | MF069155        |
| " <i>Candidatus Ehrlichia ovata</i> "               | not available   | DQ672553        |
| " <i>Candidatus Ehrlichia regneryi</i> "            | KF843826        | KJ814961        |
| " <i>Candidatus Ehrlichia shimanensis</i> "         | AB074459        | AB074462        |
| " <i>Candidatus Ehrlichia urmitei</i> "             | not available   | KU212375        |
| " <i>Candidatus Neoehrlichia arcana</i> "           | KU865441        | KU865443        |
| " <i>Candidatus Neoehrlichia australis</i> "        | KU865414        | KU865345        |
| " <i>Candidatus Neoehrlichia chilensis</i> " *      | not available   | MF805779        |
| " <i>Candidatus Neoehrlichia lotoris</i> "          | NZ_LANX01000001 | NZ_LANX01000001 |
| " <i>Candidatus Neoehrlichia mikurensis</i> "       | AB084582        | AB084583        |
| " <i>Candidatus Neoehrlichia tanzania</i> "         | KT895260        | not available   |
| <i>Neorickettsia helminthoeca</i>                   | NZ_CP007481     | NZ_CP007481     |
| <i>Neorickettsia risticii</i>                       | NC_013009       | NC_013009       |
| <i>Neorickettsia sennetsu</i>                       | NC_007798       | NC_007798       |
| <i>Rickettsia rickettsia</i>                        | CP003311        | CP003311        |
| <i>Wolbachia pipientis</i>                          | JX182384        | NWVJ01000010    |
| " <i>Candidatus Xenohalictis californiensis</i> "   | AF133090.2      | not available   |
| " <i>Candidatus Xenolissoclinum pacificiensis</i> " | AXCJ01000001    | AXCJ01000003    |

**Note:** \* = Not included in the phylogenetic analyses with concatenated sequences.
