# Supplementary material for: A novel candidate species of Anaplasma that infects avian erythrocytes
Source: Springer Nature journal article supplement (doi:10.1186/s13071-018-3089-9), 2018-09-24

**Additional file 3: Figure S1.** Cytoplasmic inclusions in a lymphocyte of an African penguin (*Spheniscus demersus*) infected by “*Candidatus Anaplasma sphenisci*”. The lymphocyte with cytoplasmic inclusions (upper right) and a normal lymphocyte (lower left) are shown. Cytoplasmic inclusions had a width of  $1.98 \pm 0.54 \mu\text{m}$  (range = 0.86–3.10  $\mu\text{m}$ ). Modified Wright-Giemsa stain. Scale-bar: 5  $\mu\text{m}$ .

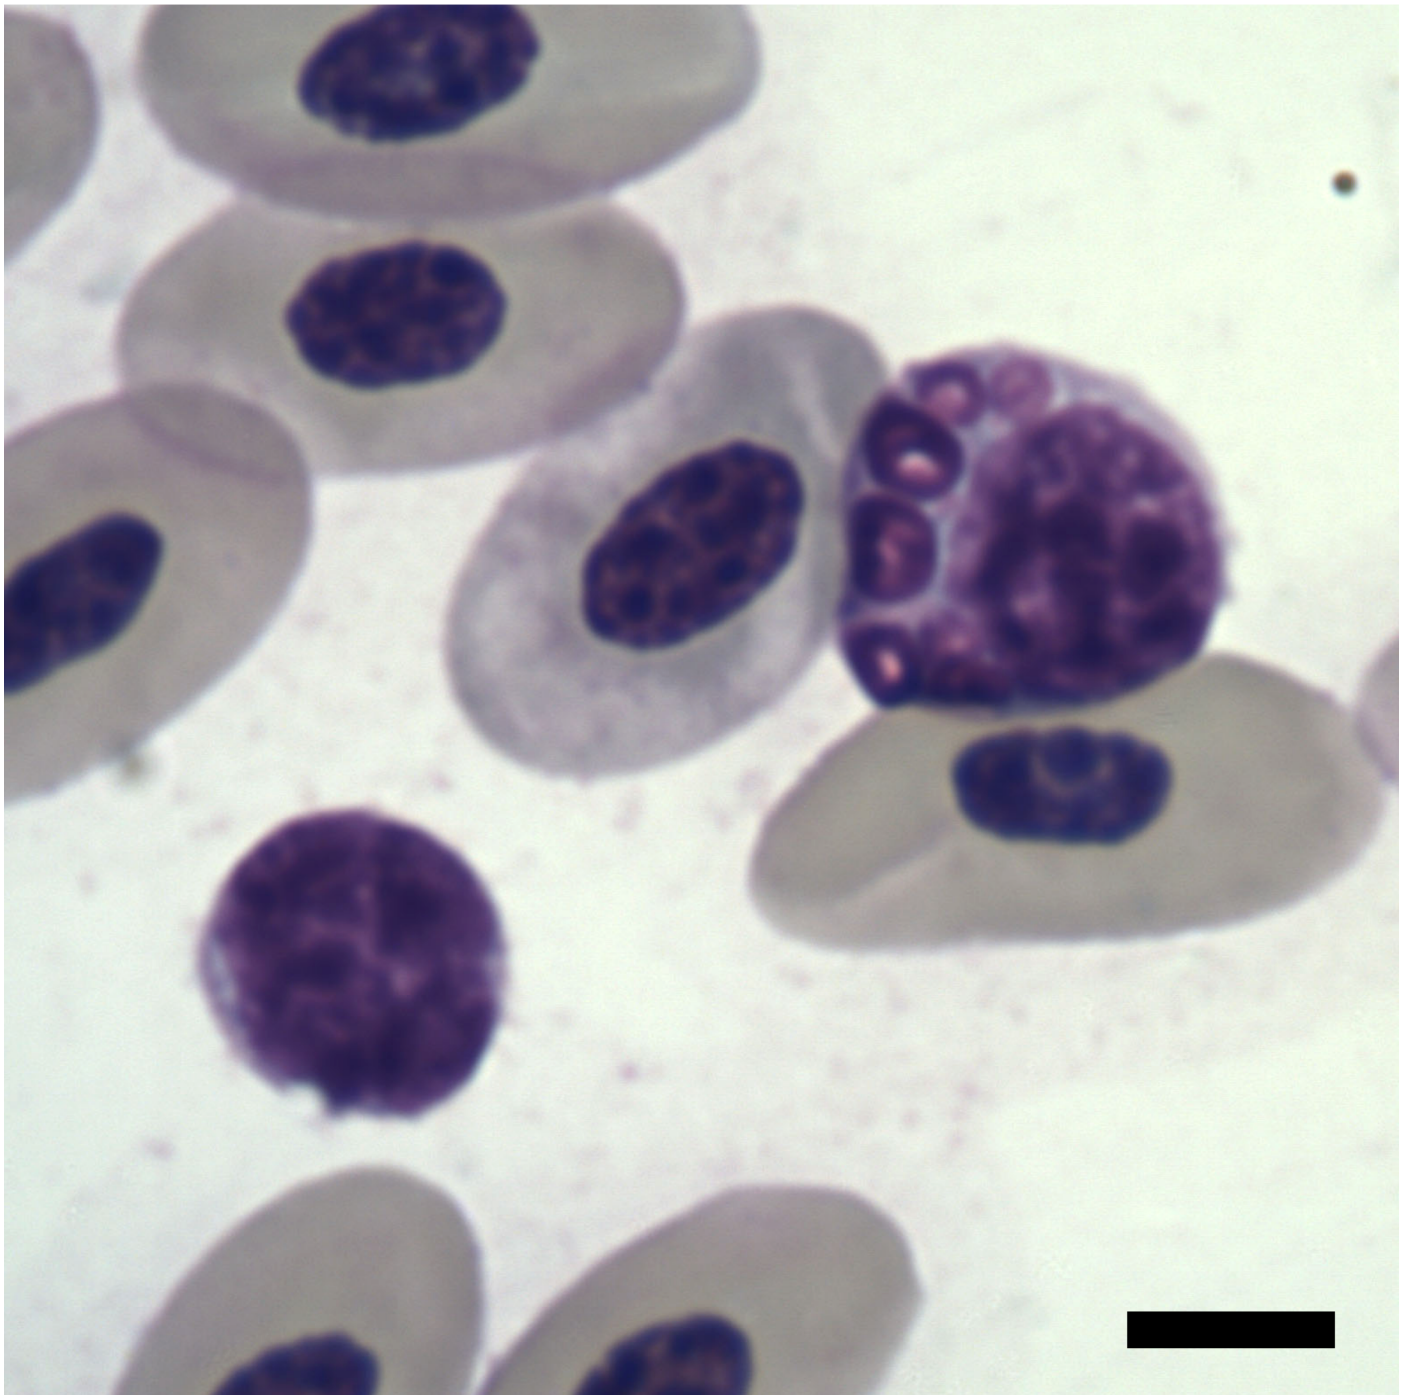

Supplement: 13071_2018_3089_MOESM3_ESM.pdf [file 13071_2018_3089_MOESM3_ESM.pdf]
