# Supplementary material for: A novel candidate species of Anaplasma that infects avian erythrocytes
Source: Springer Nature journal article supplement (doi:10.1186/s13071-018-3089-9), 2018-09-24

**Additional file 4: Figure S2.** Phylogenetic relationships of “*Candidatus Anaplasma sphenisci*” as determined by different phylogenetic methods based on partial sequences of the 16S *rRNA* and *groEL* genes. Branch lengths are drawn proportionally to evolutionary distance (scale-bars are shown). Numbers adjacent to nodes indicate bootstrap values (a, b, d, e) or posterior probabilities (c, g).

**(a)** 16S *rRNA*, Neighbor-Joining

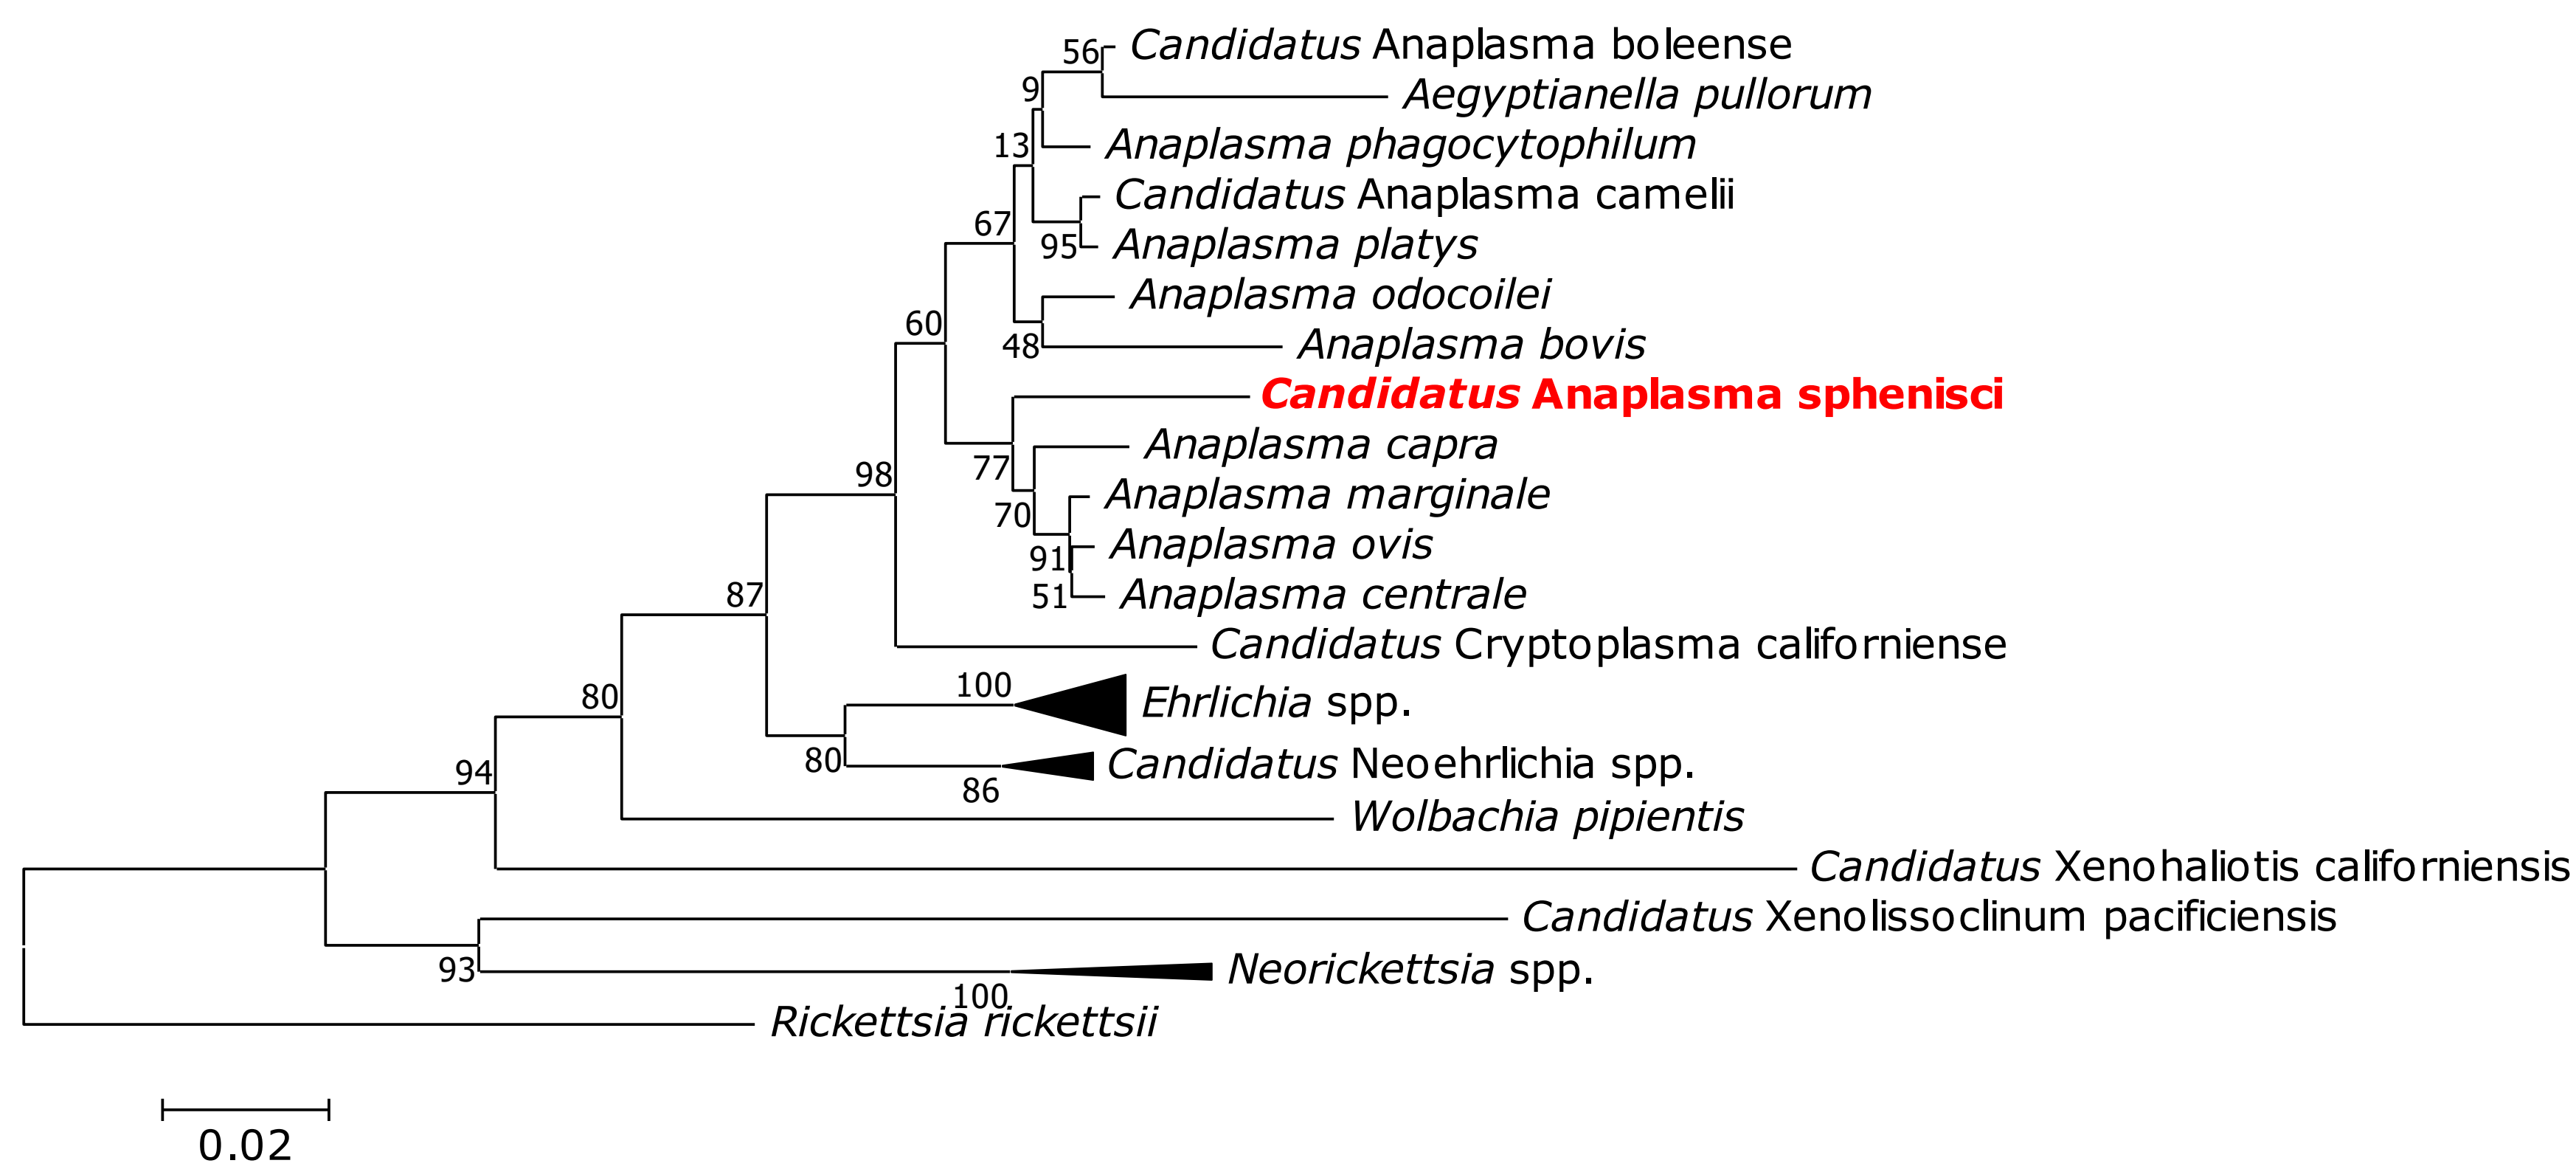

**(d)** *groEL*, Neighbor-Joining

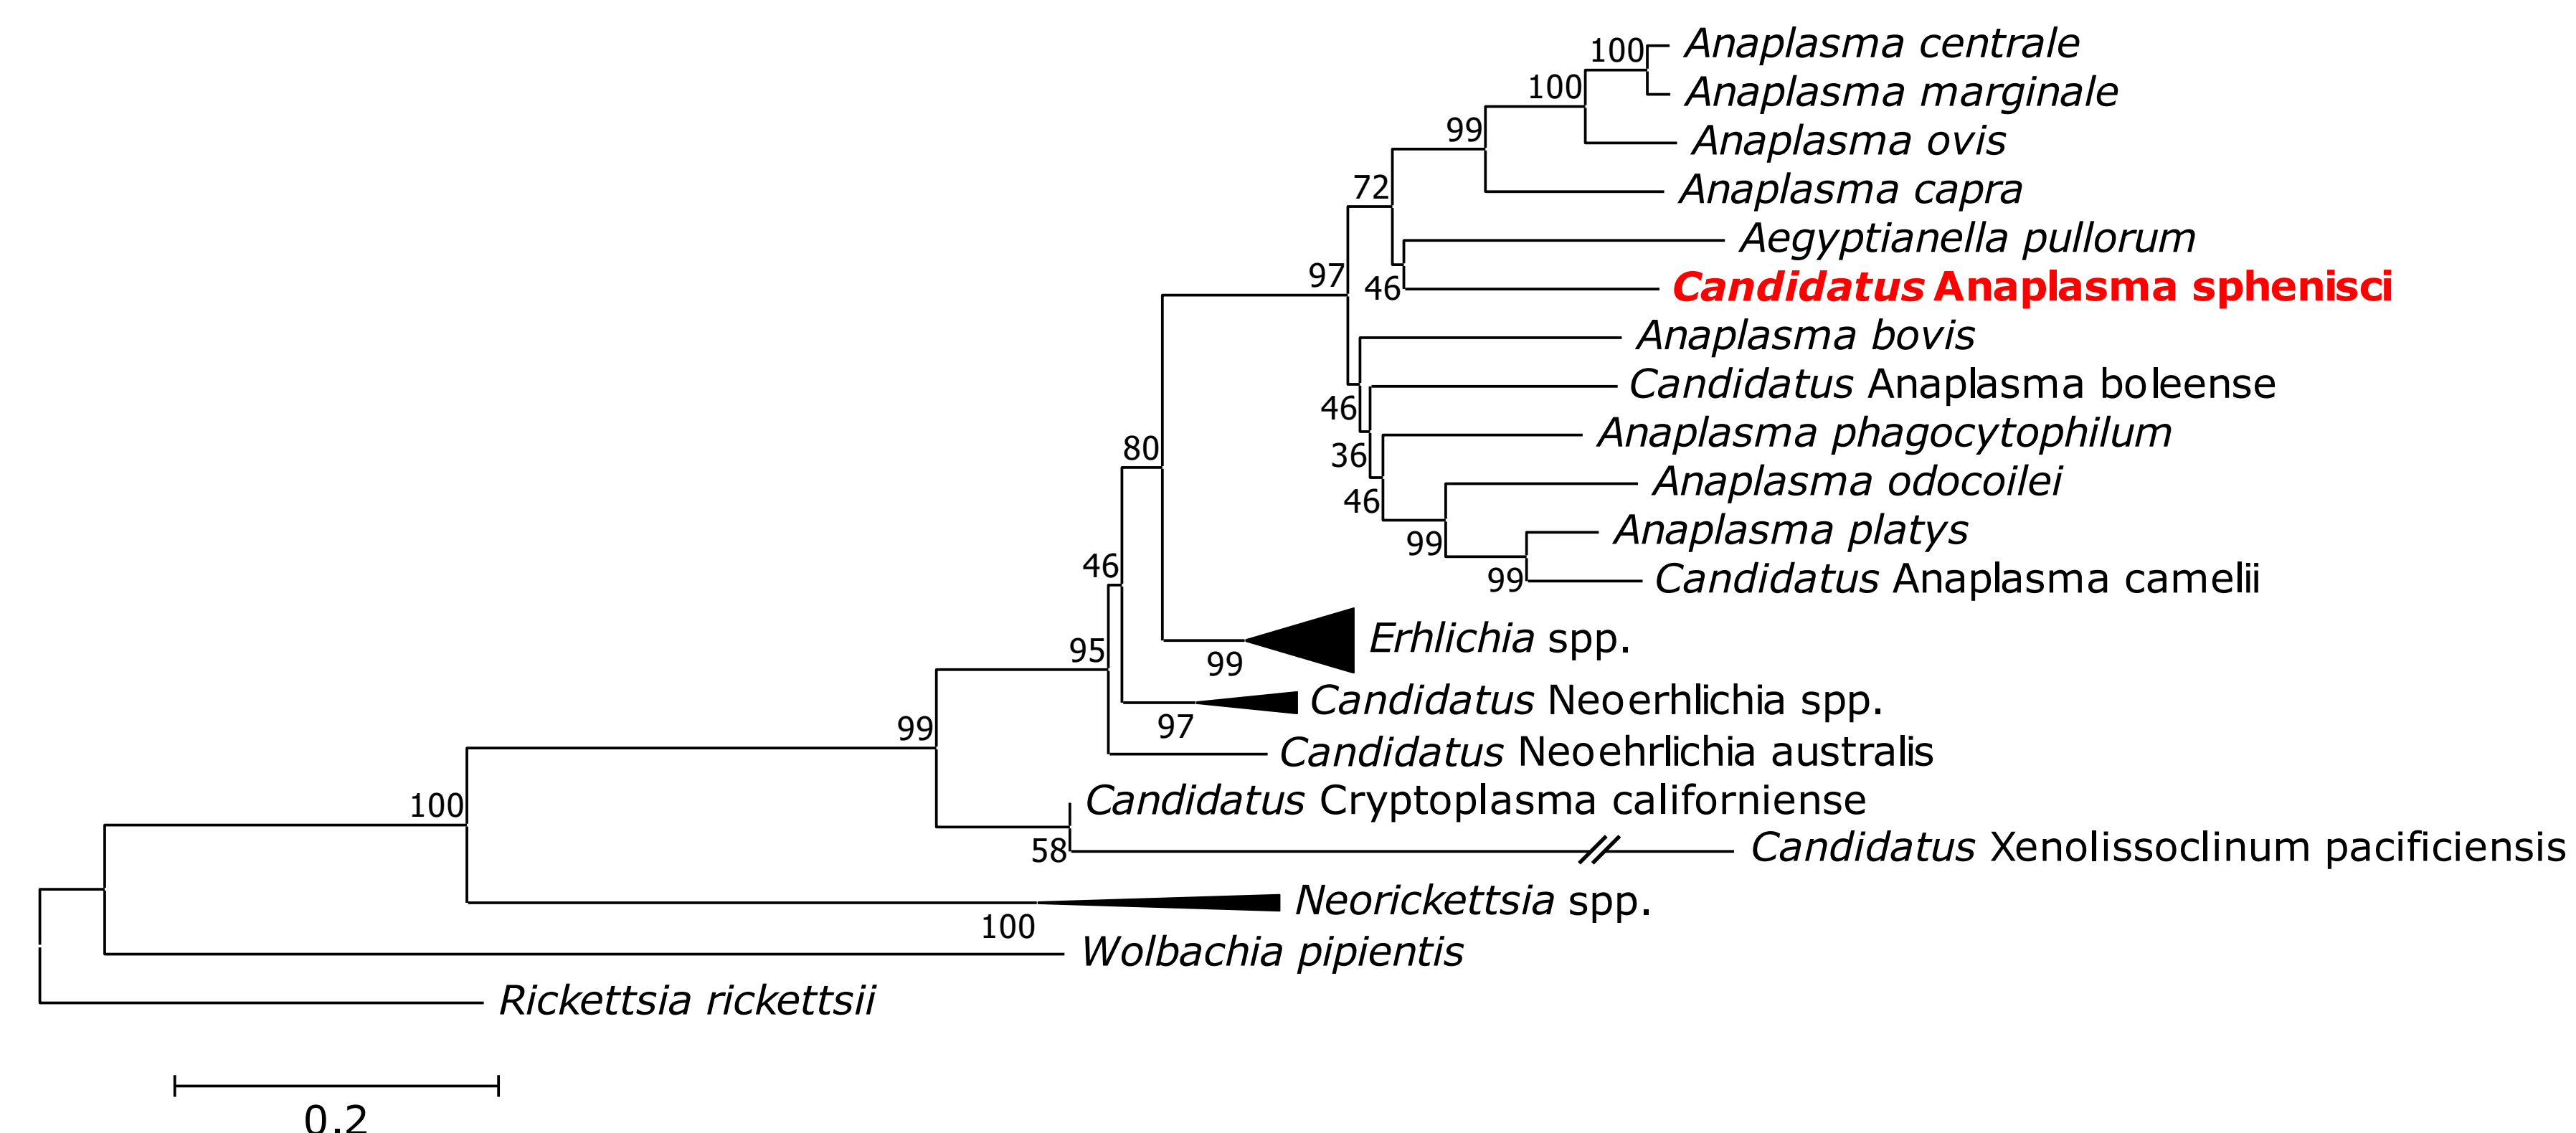

**(b)** 16S *rRNA*, Maximum Likelihood

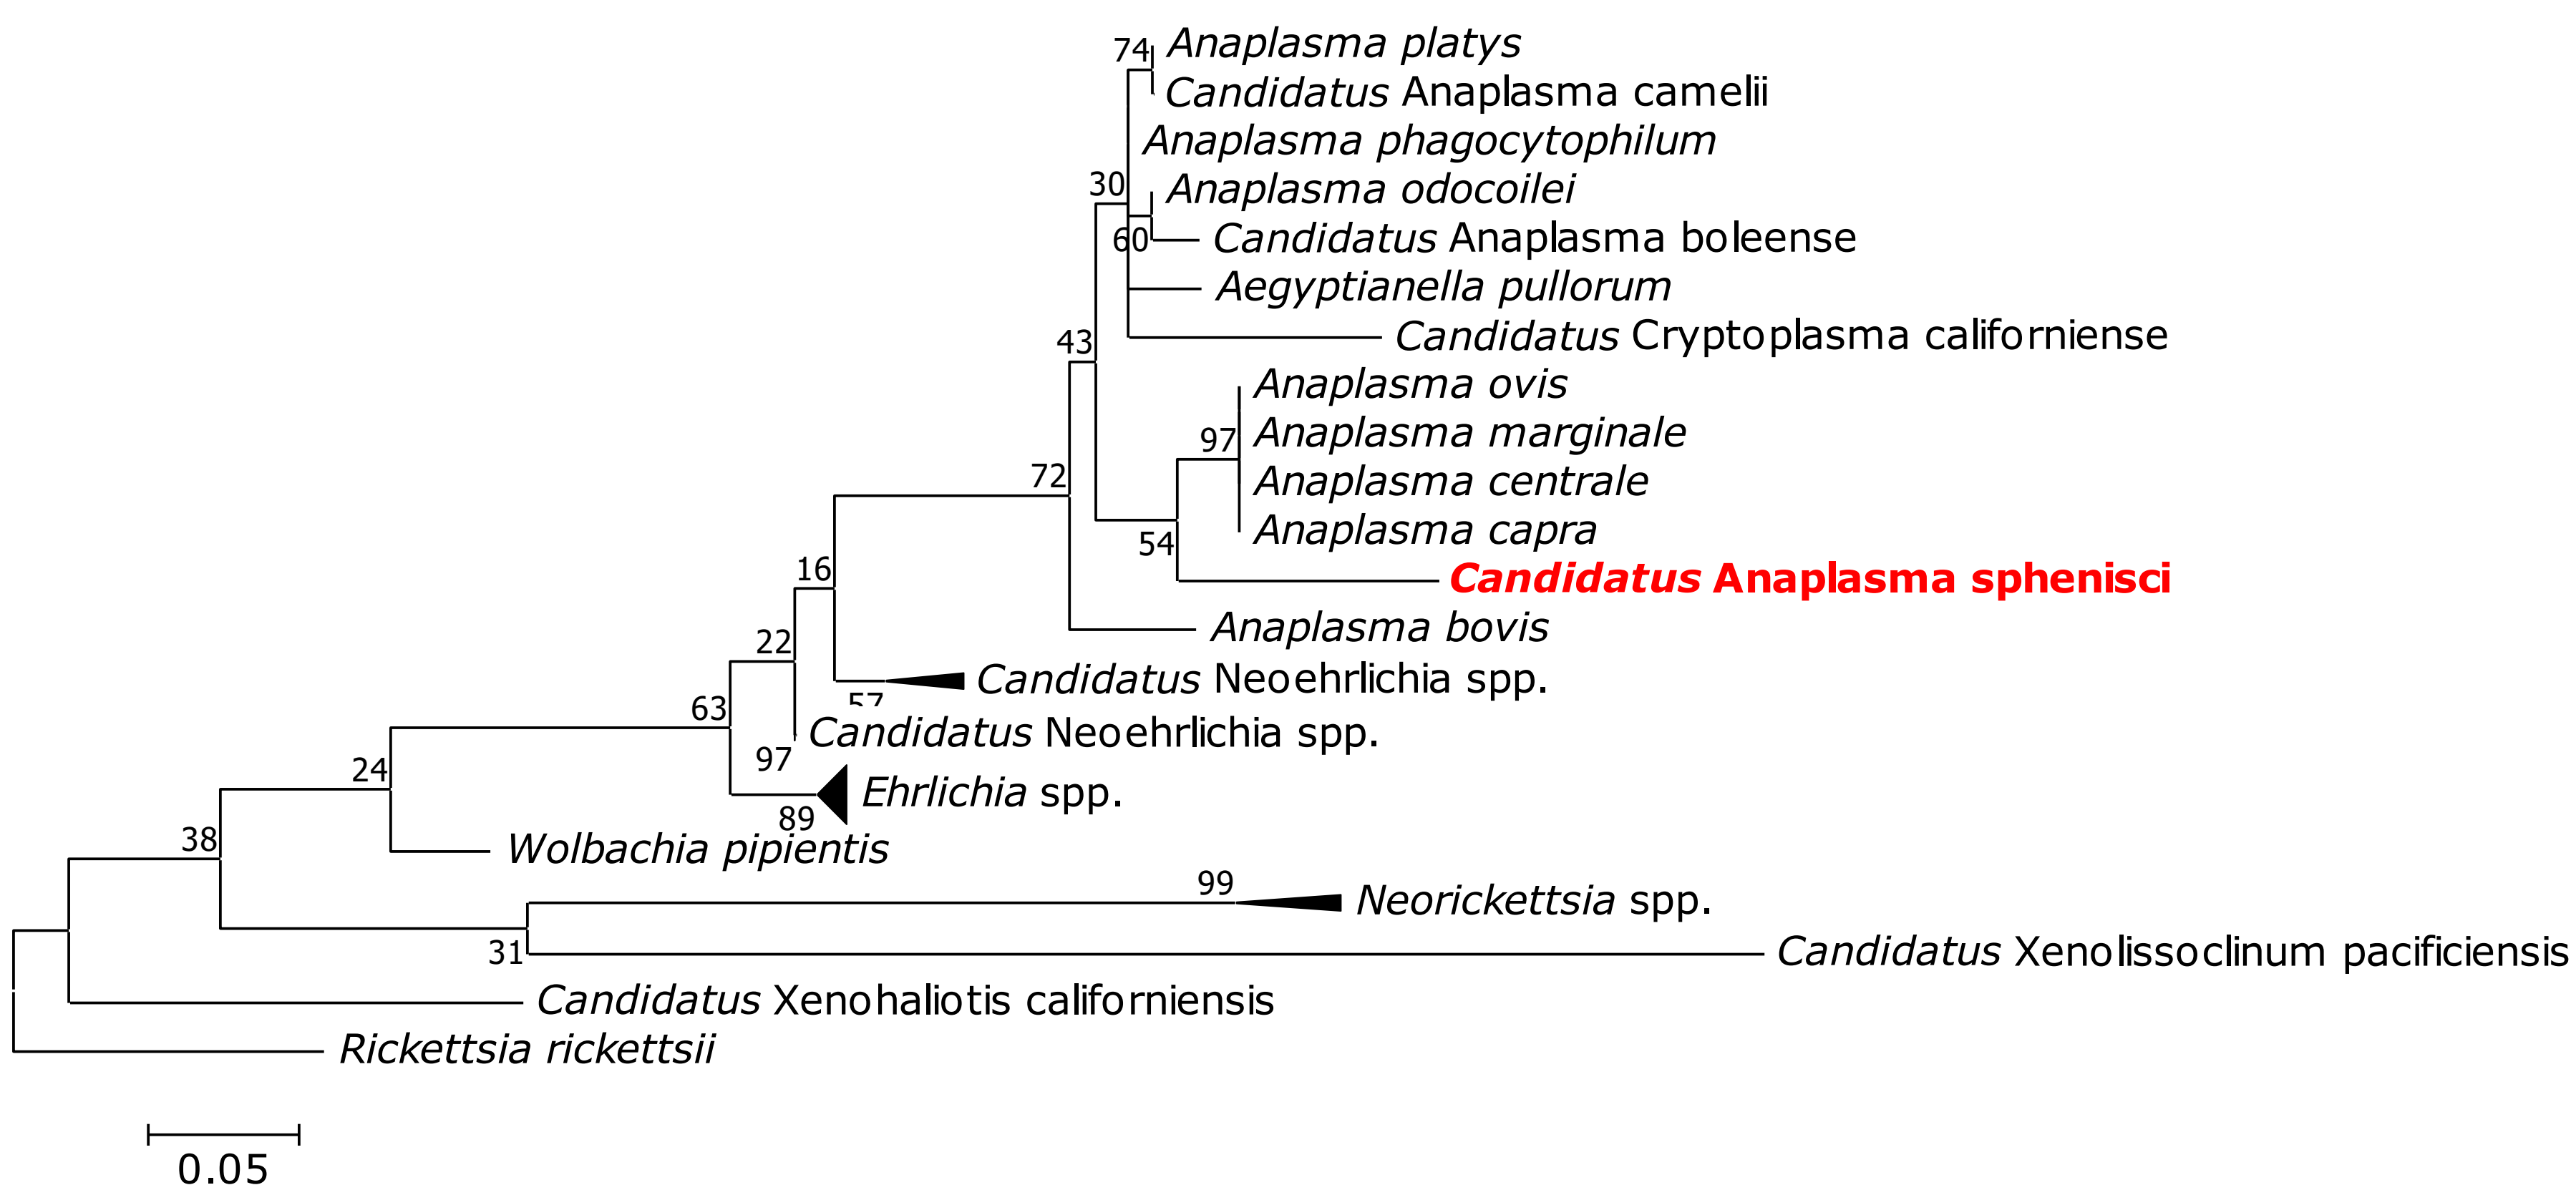

**(e)** *groEL*, Maximum Likelihood

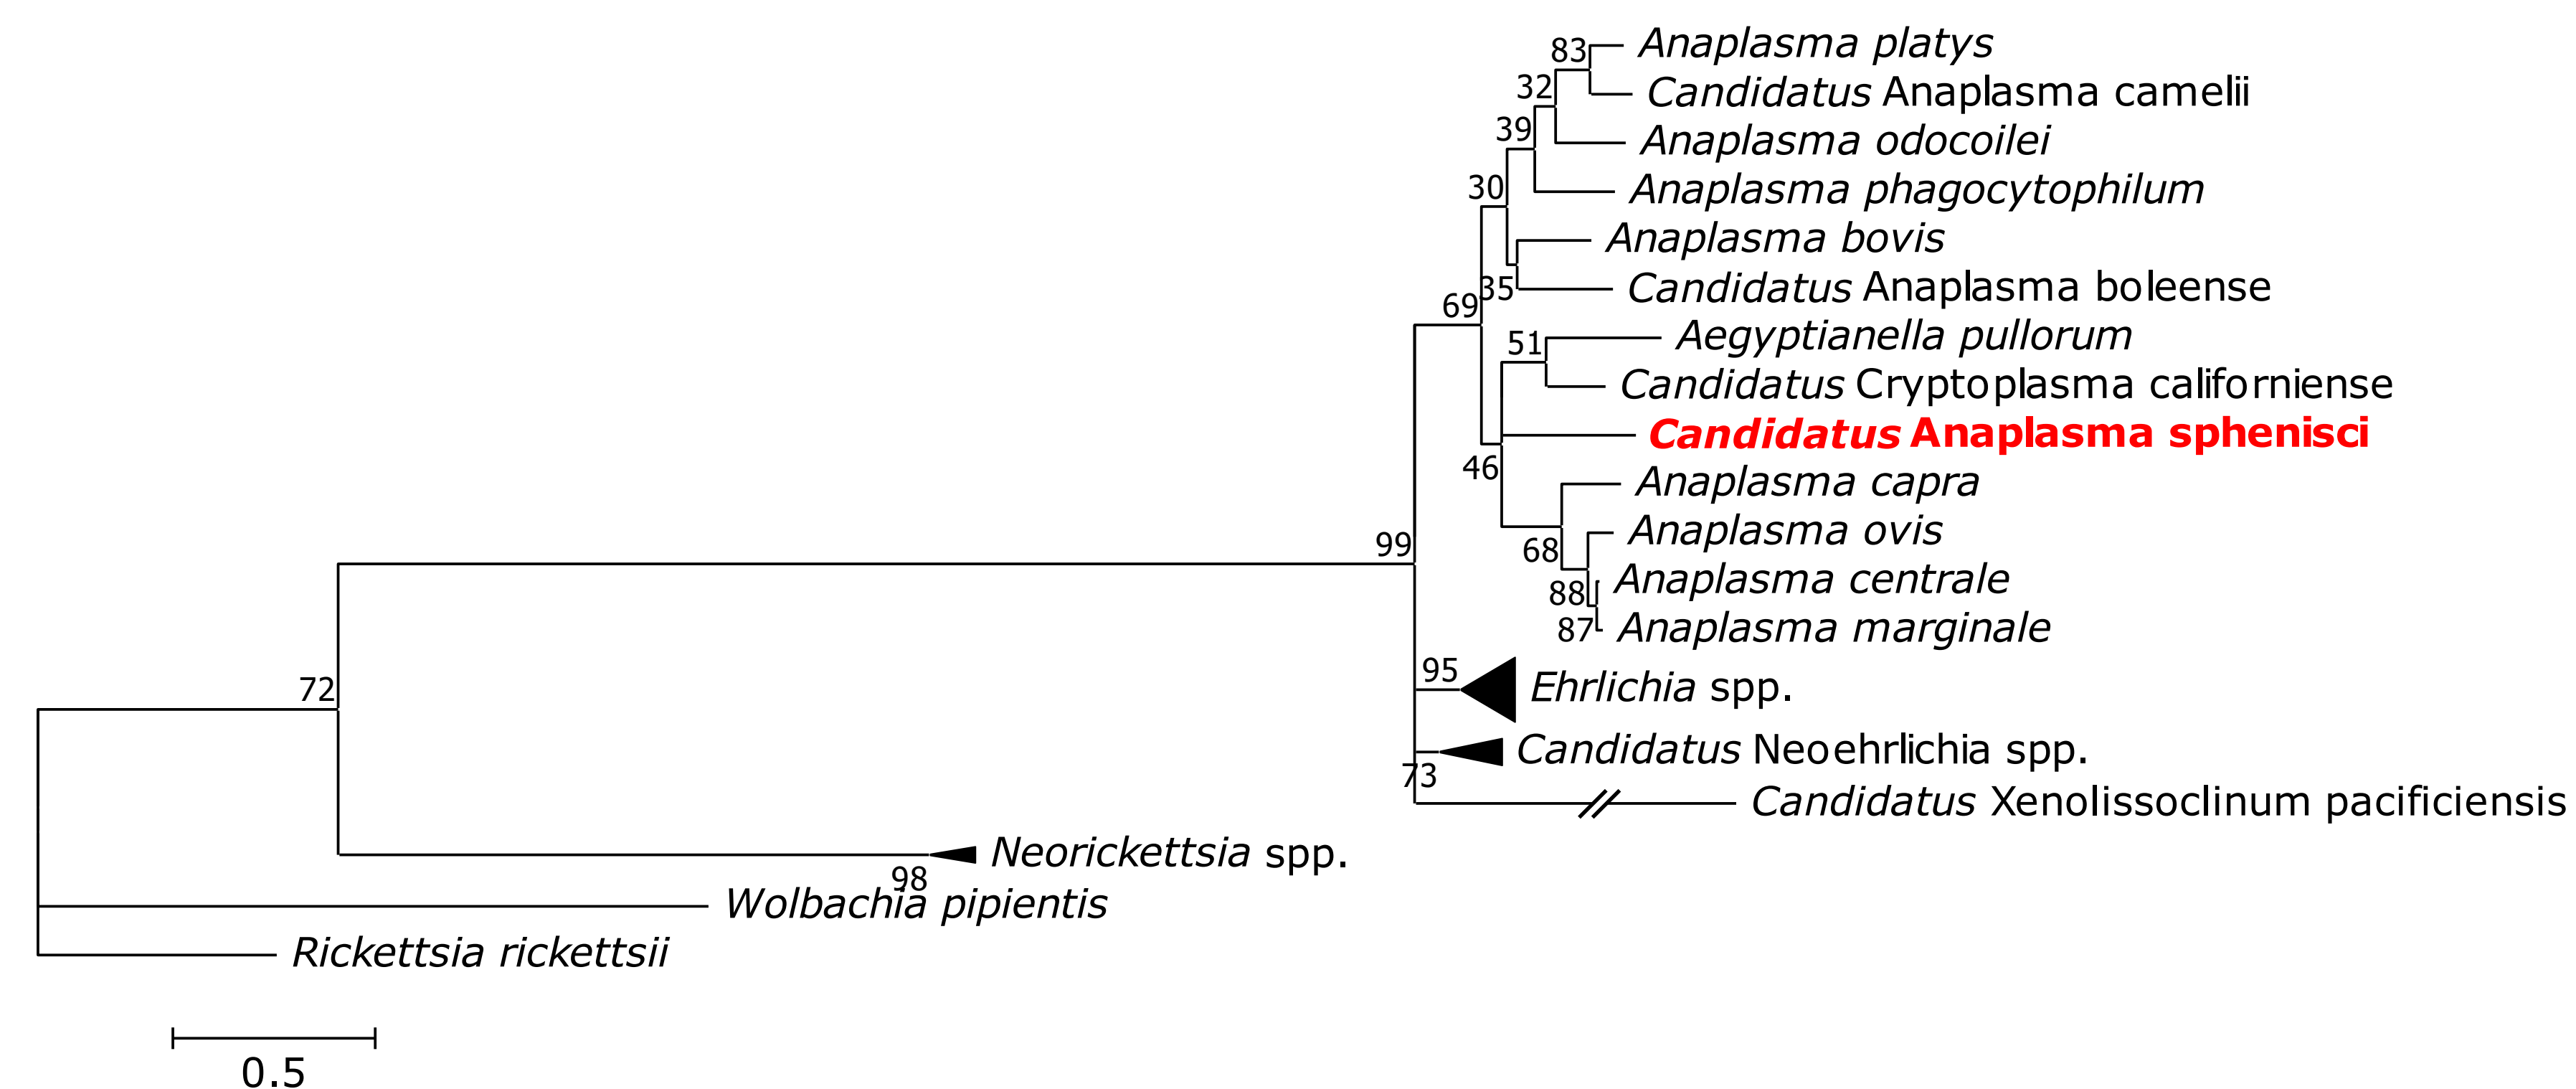

**(c)** 16S *rRNA*, Bayesian Inference

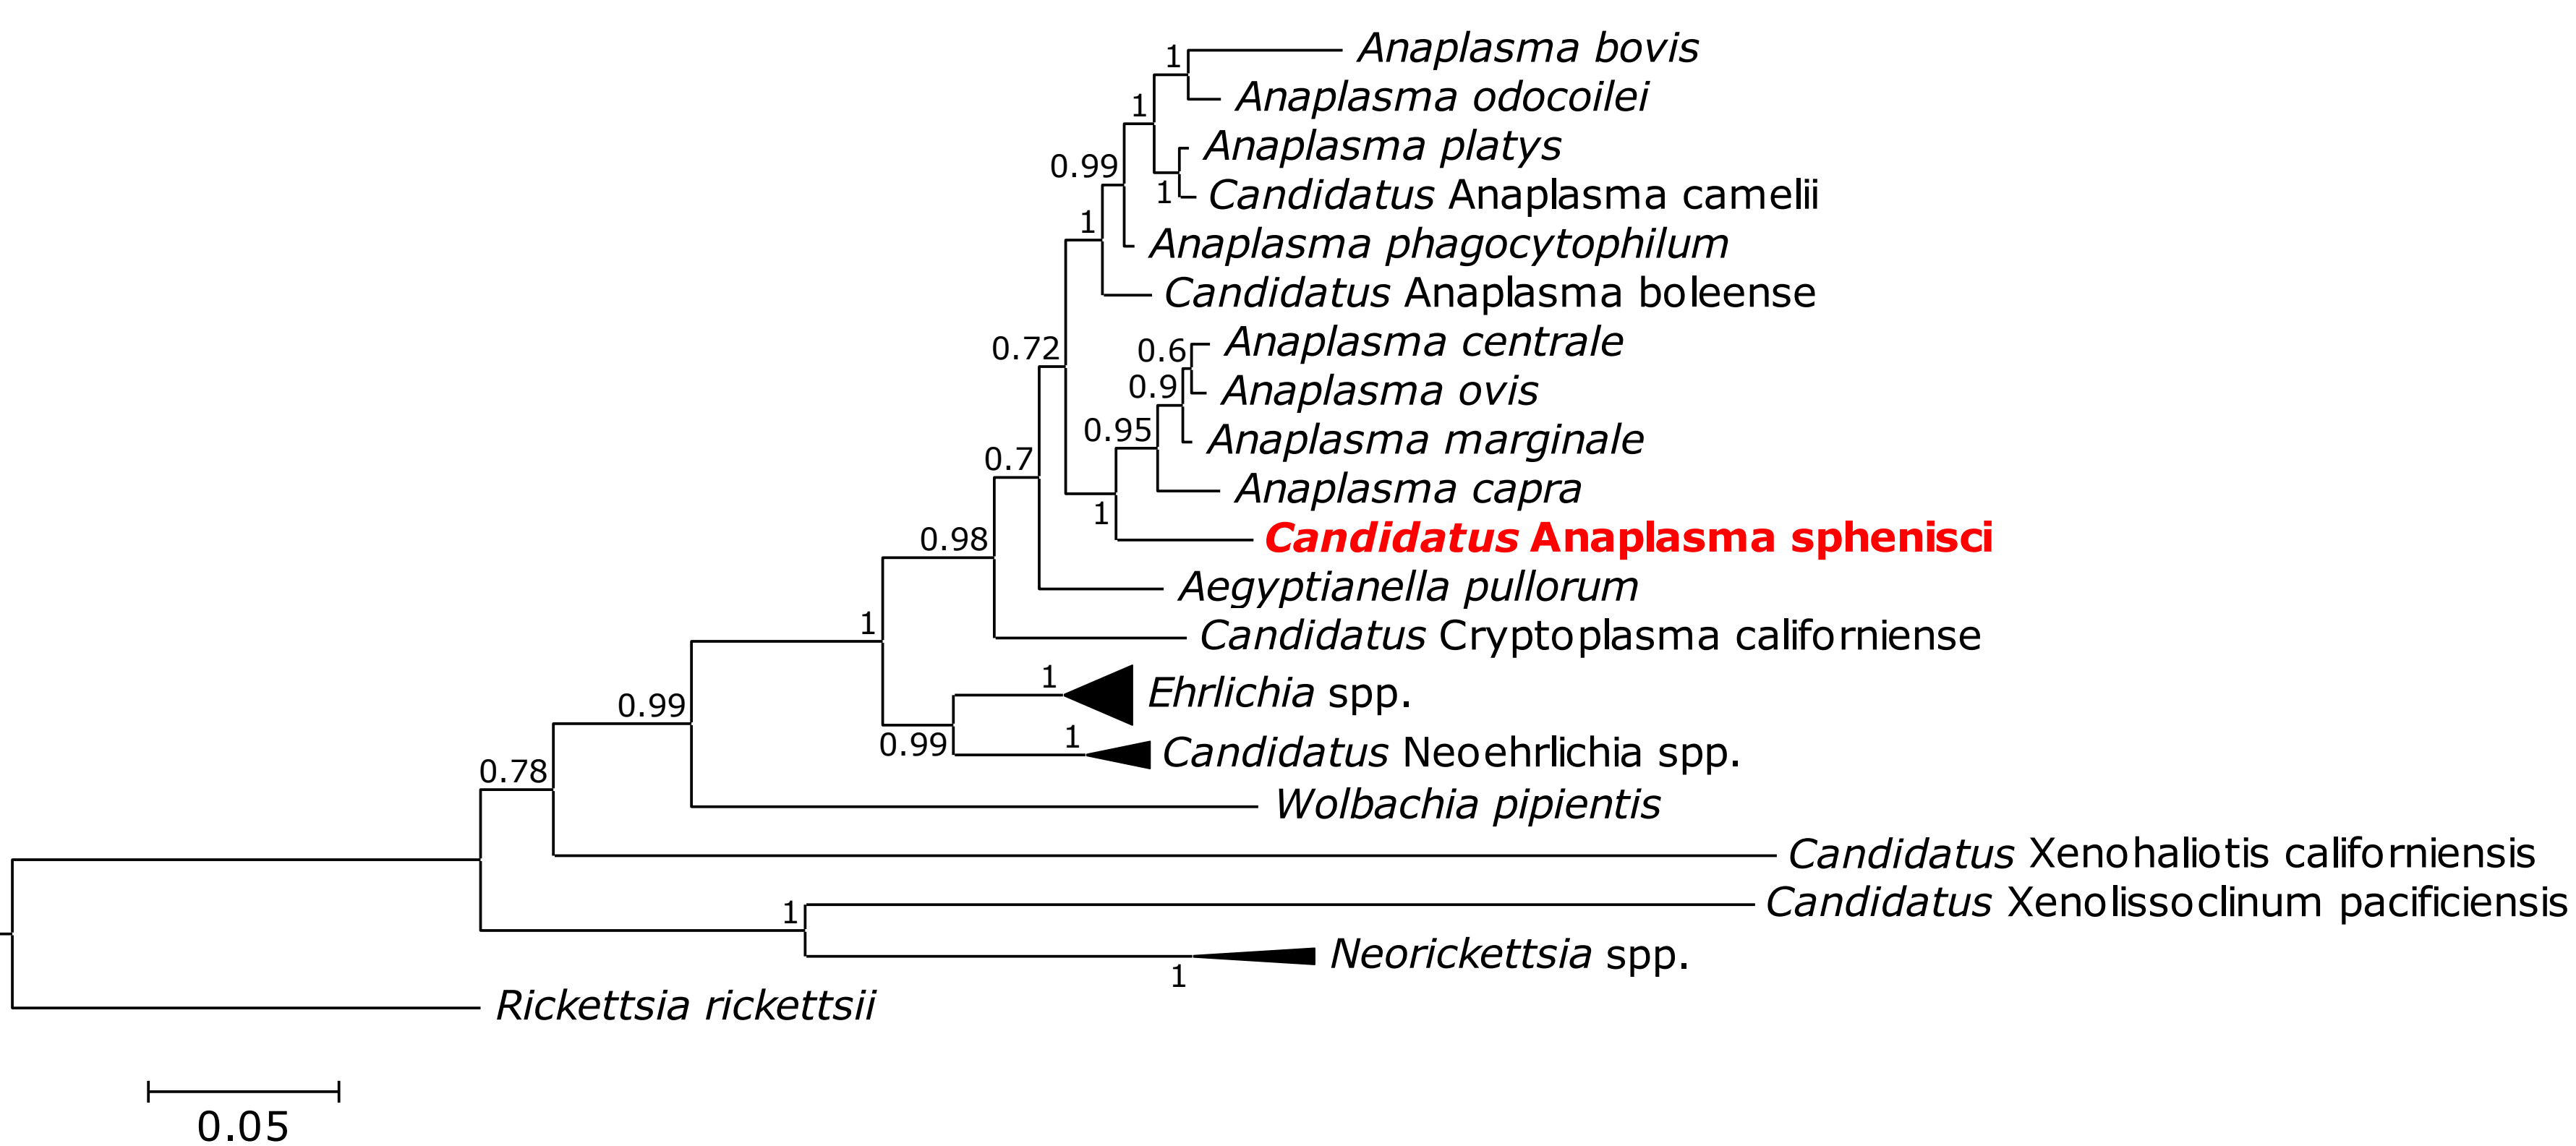

**(f)** *groEL*, Bayesian Inference

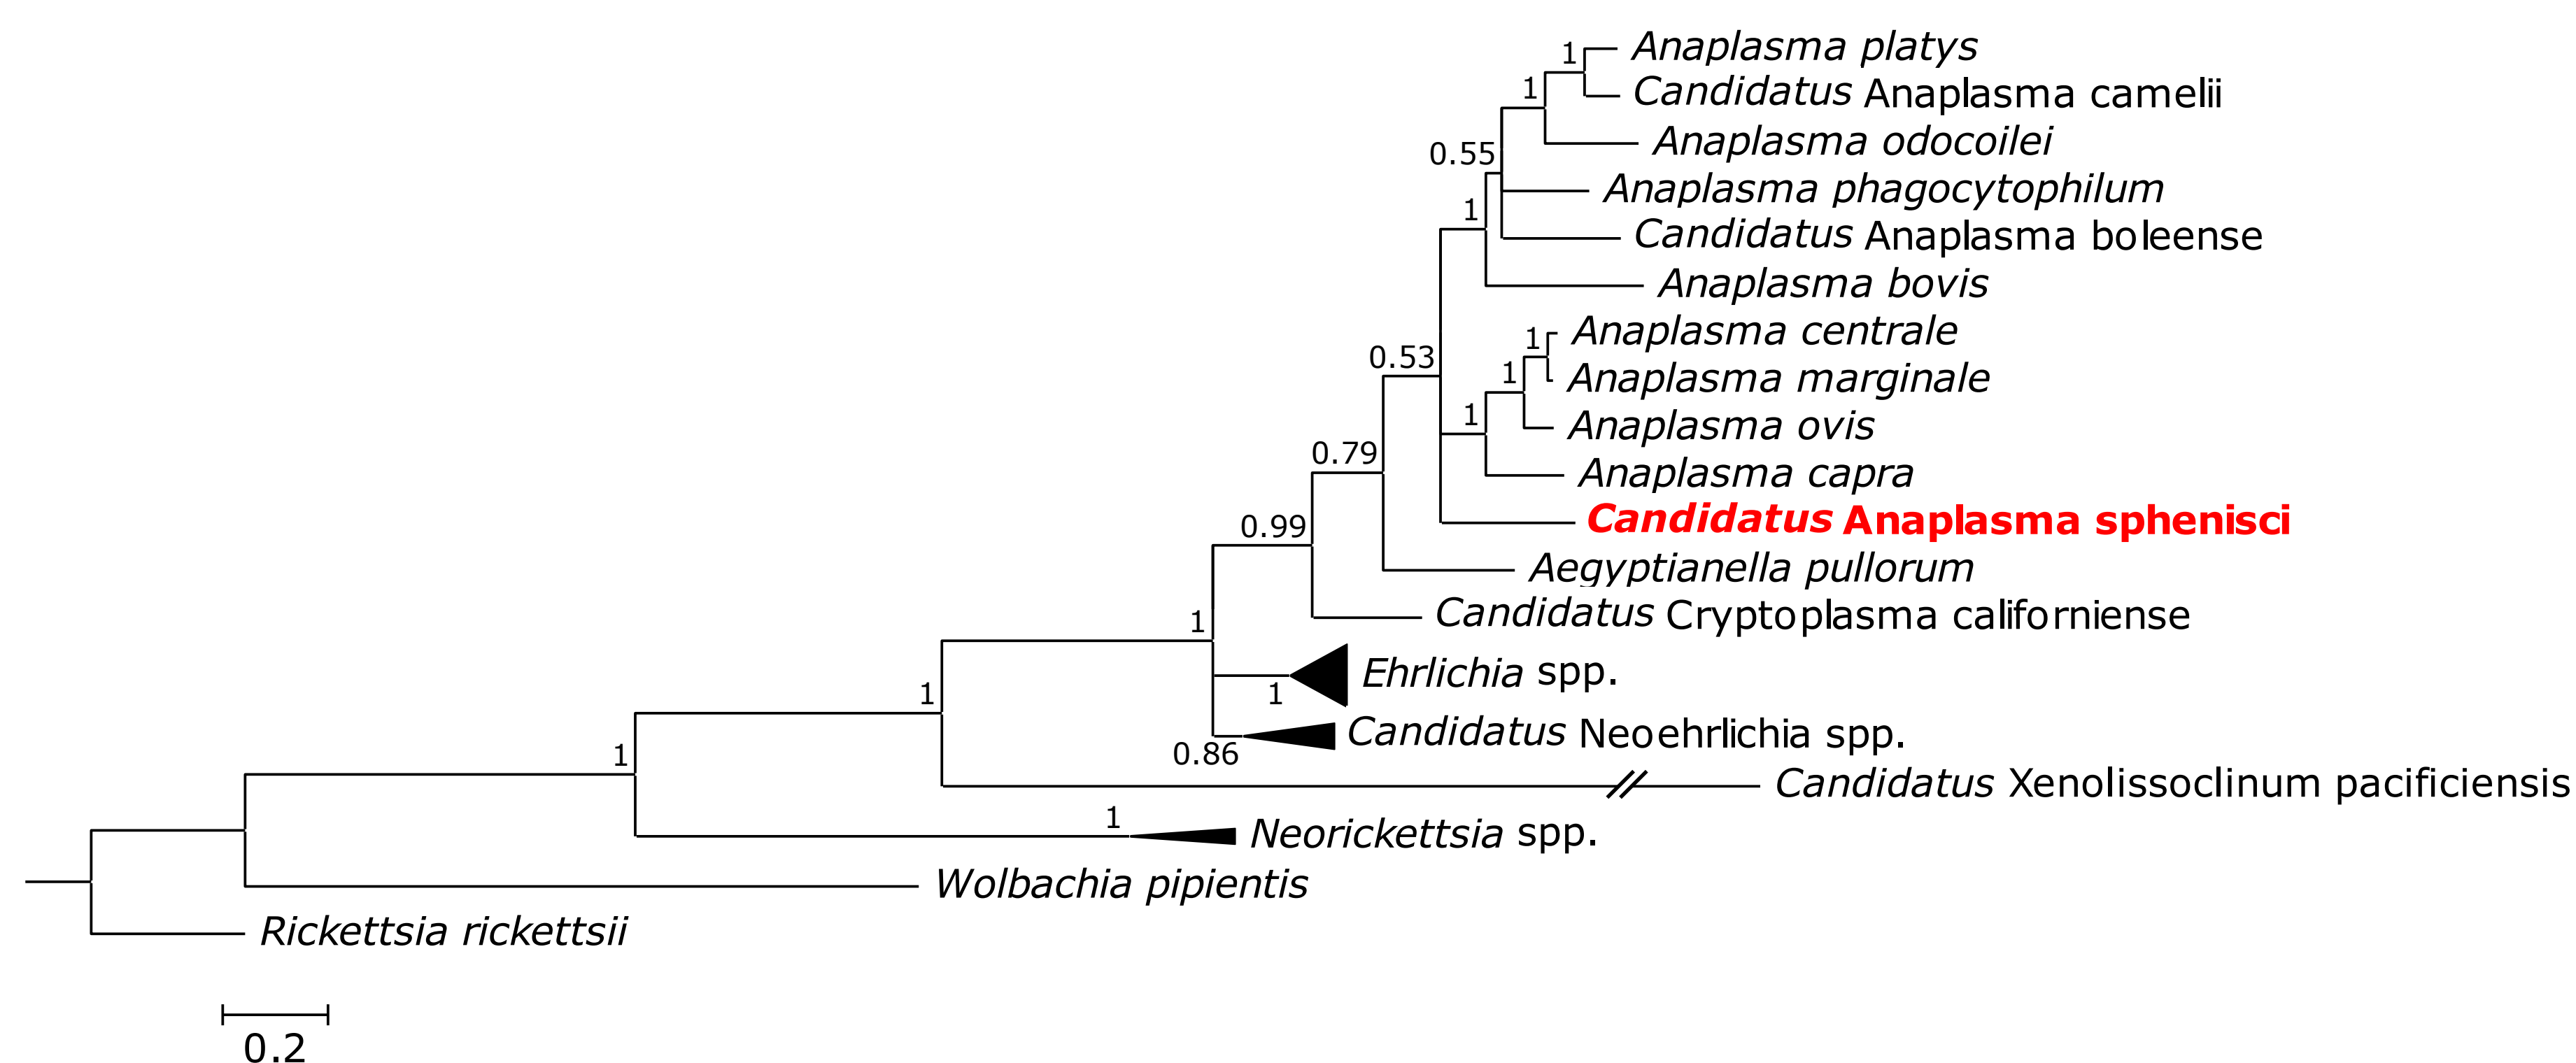

Supplement: 13071_2018_3089_MOESM4_ESM.pdf [file 13071_2018_3089_MOESM4_ESM.pdf]
